# Supplementary material for: Multifunctional hydrogel coatings with high antimicrobial loading efficiency and pH-responsive properties for urinary catheter applications
Source: Royal Society of Chemistry journal article supplement (doi:10.1039/d3tb00148b), 2023-01-01
Supplement: d3tb00148b1.pdf [file d3tb00148b1.pdf]

## Supporting Information

### **Multifunctional hydrogel coatings with high antimicrobial loading efficiency and pH-responsive property for urinary catheter applications**

**Jiru Miao<sup>a,b</sup>, Xiang Wu<sup>b,c</sup>, Yue Fang<sup>b</sup>, Mingzhu Zeng<sup>b</sup>, Zhimao Huang<sup>b</sup>, Mi  
Ouyang<sup>a\*</sup> and Rong Wang<sup>b,d\*</sup>**

*<sup>a</sup> College of Chemical Engineering, Zhejiang University of Technology, Hangzhou, 310014, P. R. China. E-mail: ouyang@zjut.edu.cn*

*<sup>b</sup> Zhejiang International Scientific and Technological Cooperative Base of Biomedical Materials and Technology, Zhejiang Engineering Research Center for Biomedical Materials, Cixi Institute of Biomedical Engineering, Ningbo Institute of Materials Technology and Engineering, Chinese Academy of Sciences, Ningbo, 315300, P. R. China. E-mail: rong.wang@nimte.ac.cn*

*<sup>c</sup> Department of Hepatobiliary and Pancreatic Surgery, Affiliated Li Huili Hospital, Ningbo University School of Medicine, Ningbo, 315000, P. R. China*

*<sup>d</sup> University of Chinese Academy of Sciences, Beijing, 101408, P. R. China*

**Table S1.** Relative area of the deconvoluted peaks of C1s of different surfaces.

| Peak/Binding energy | Percentage (%) |       |         |
|---------------------|----------------|-------|---------|
|                     | PT0            | PT8   | PT8-NFZ |
| C-C/C-H (284.8 eV)  | 49.08          | 54.42 | 40.27   |
| C-N (285.6 eV)      | 17.29          | 13.37 | 17.05   |
| C-O (286.15 eV)     | 16.39          | 18.38 | 25.22   |
| C=O (287.5 eV)      | 4.24           | 1.45  | 4.02    |
| C-S (287 eV)        | 7.75           | 7.3   | 7.32    |
| O=C-O (288.7 eV)    | 5.26           | 5.07  | 6.12    |
| Total               | 100            | 100   | 100     |

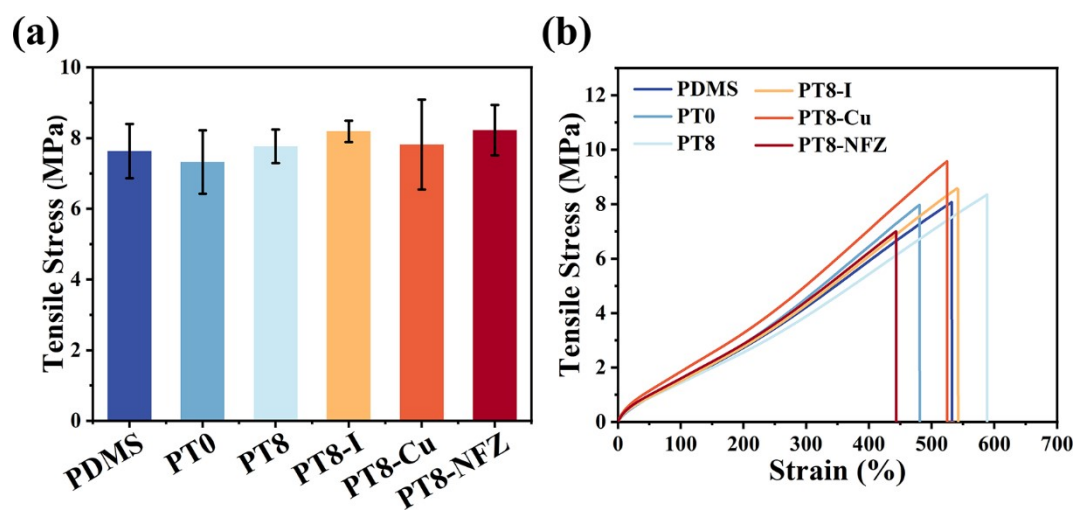

**Figure S1.** (a) Tensile strength of pristine PDMS and modified PDMS. (b)

Representative tensile stress-strain curves of pristine PDMS and modified PDMS.

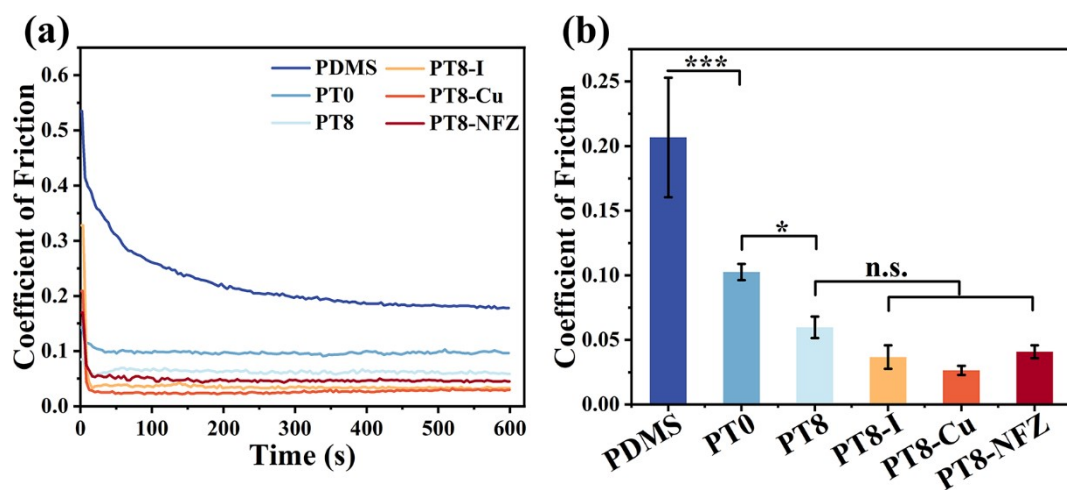

**Figure S2.** (a) COF-time curves of pristine PDMS surface and modified PDMS surfaces in artificial urine. (b) The average values of COF of pristine PDMS and modified PDMS in artificial urine.

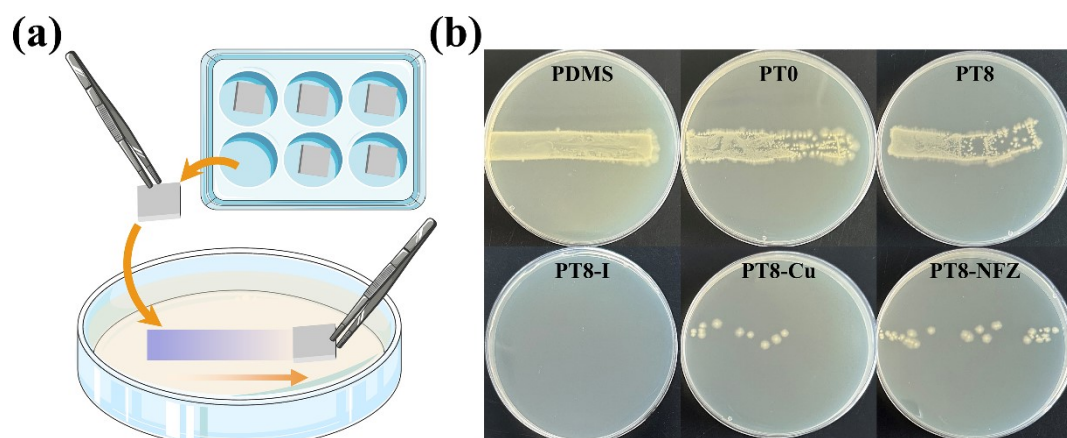

**Figure S3.** (a) Schematic diagram illustrating PDMS sheets after bacterial assay slid on an agar plate. (b) Pristine and modified PDMS sheets slid on agar plate after exposure to *E. coli* suspension ( $10^8$  CFU/mL in PBS) for 4 h.

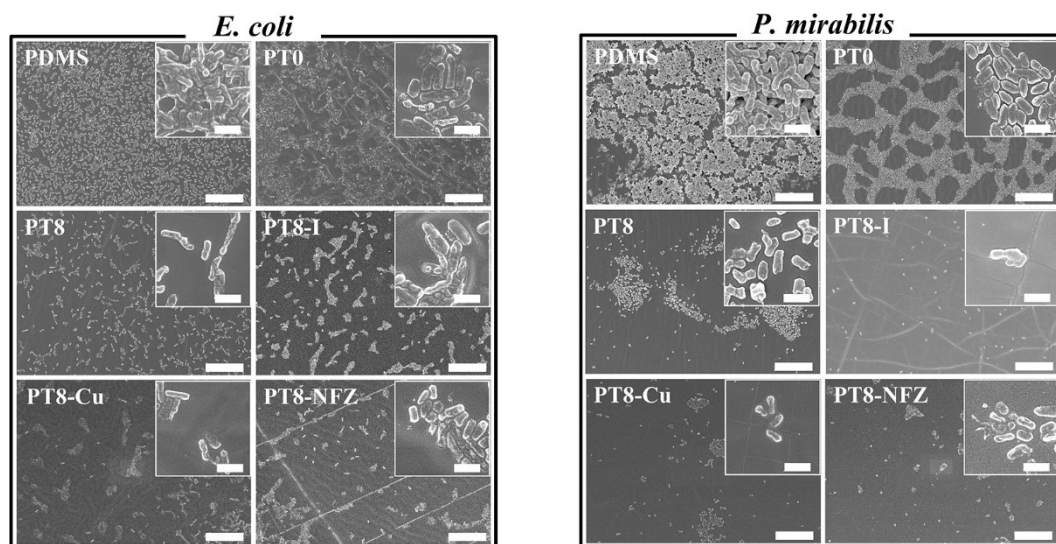

**Figure S4.** Biofilm formation on pristine and modified PDMS surfaces after incubation in growth medium containing  $10^5$  CFU/mL (initial concentration) of *E. coli* and *P. mirabilis* for 24 h. Scale bars represent 20  $\mu$ m and 2  $\mu$ m in the main images and insets, respectively.

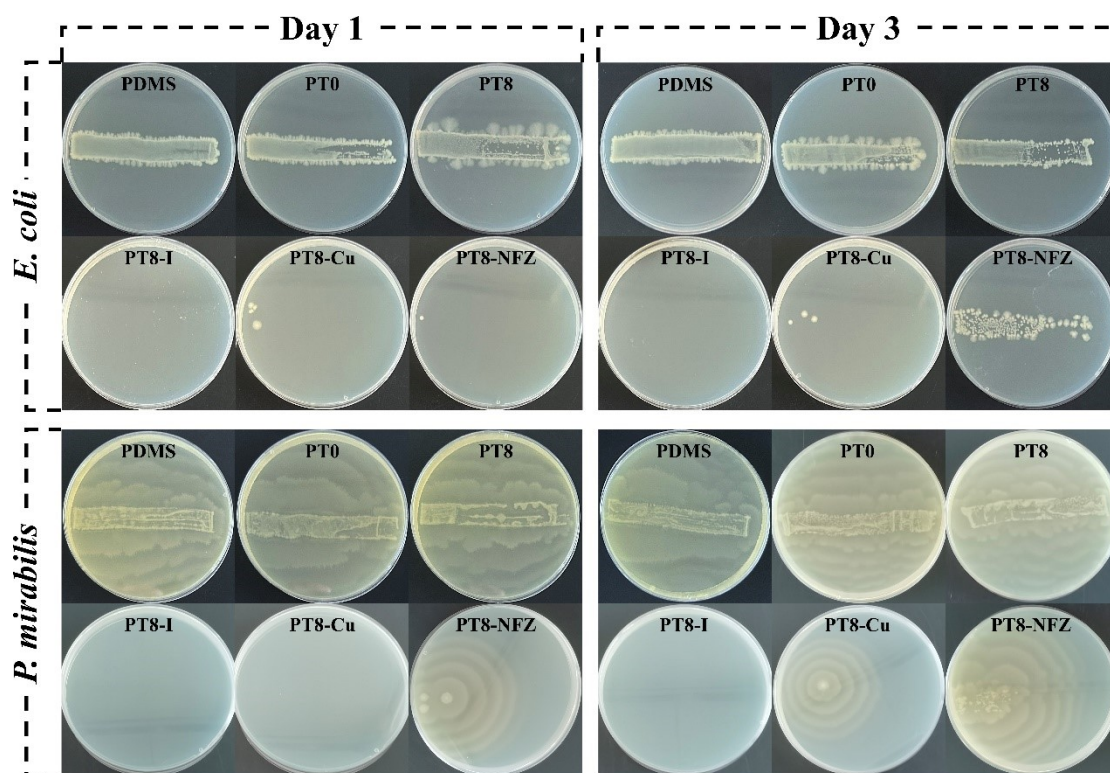

**Figure S5.** Pristine and modified PDMS sheets slid on agar plate after incubation in growth medium containing  $10^5$  CFU/mL (initial concentration) of *E. coli* and *P. mirabilis* for 24 h and 72 h. Culture medium was changed daily.

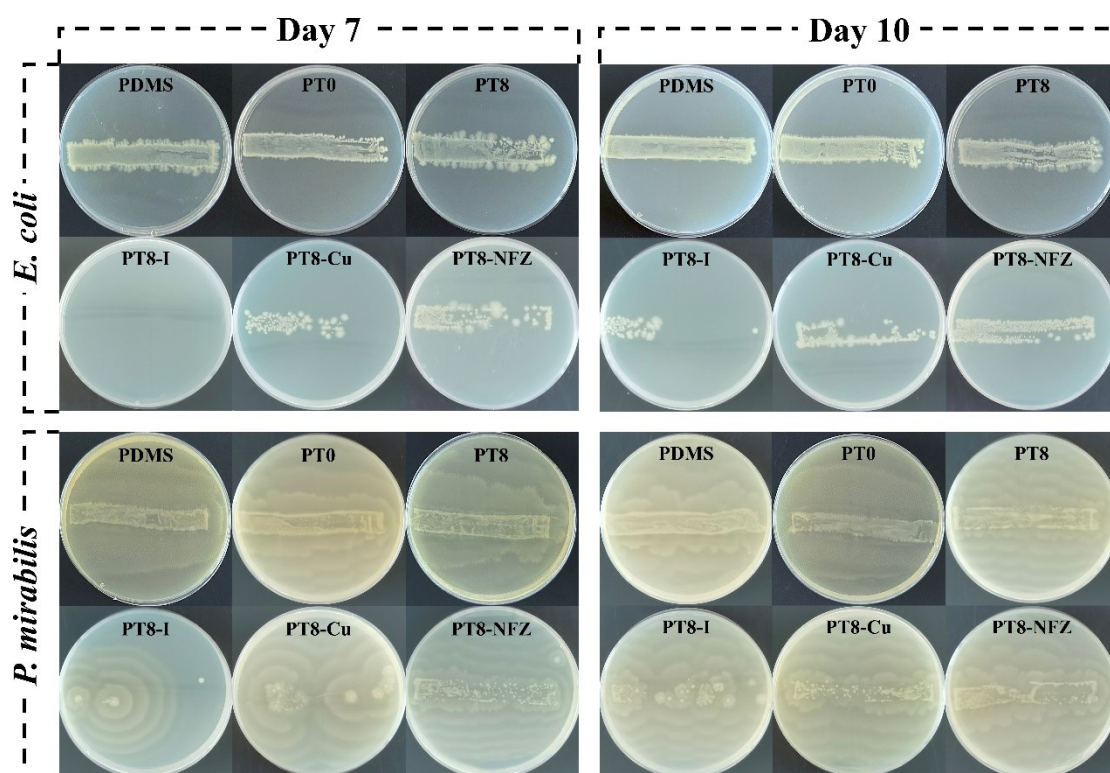

**Figure S6.** Pristine and modified PDMS sheets slid on agar plate after incubation in growth medium containing  $10^5$  CFU/mL (initial concentration) of *E. coli* and *P. mirabilis* for 7 days and 10 days. Culture medium was changed daily.

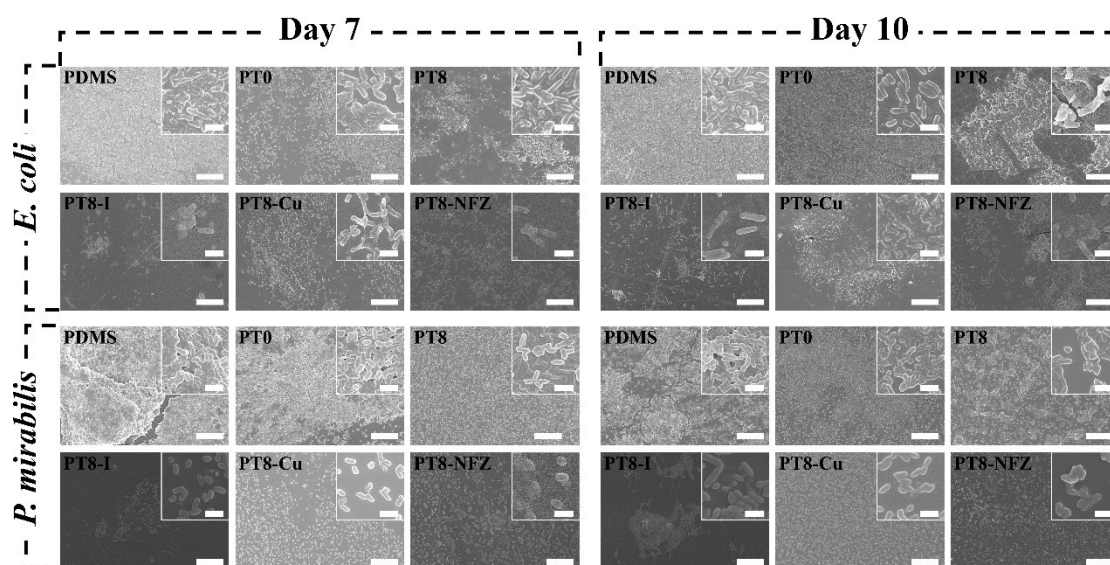

**Figure S7.** Biofilm formation on pristine and modified PDMS surfaces after incubation in growth medium containing  $10^5$  CFU/mL (initial concentration) of *E. coli* and *P. mirabilis* for 7 days and 10 days. Culture medium was changed daily. Scale bars represent 20  $\mu\text{m}$  and 2  $\mu\text{m}$  in the main images and insets, respectively.

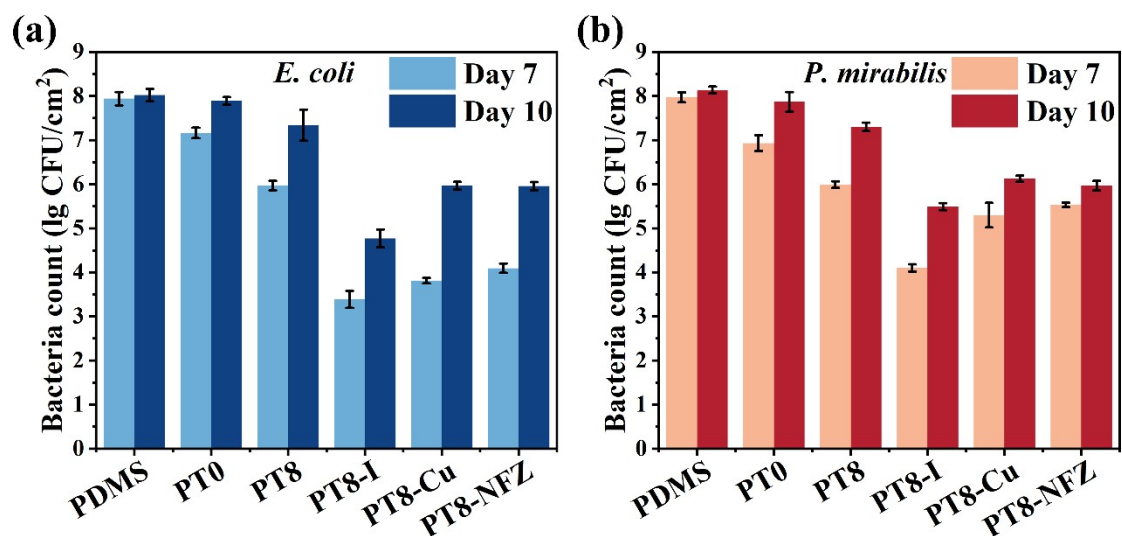

**Figure S8.** Number of alive bacterial cells adhering on pristine and modified PDMS surfaces after incubation of in growth medium containing  $10^5$  CFU/mL (initial concentration) of (a) *E. coli* and (b) *P. mirabilis* for 7 days and 10 days. Culture medium was changed daily.

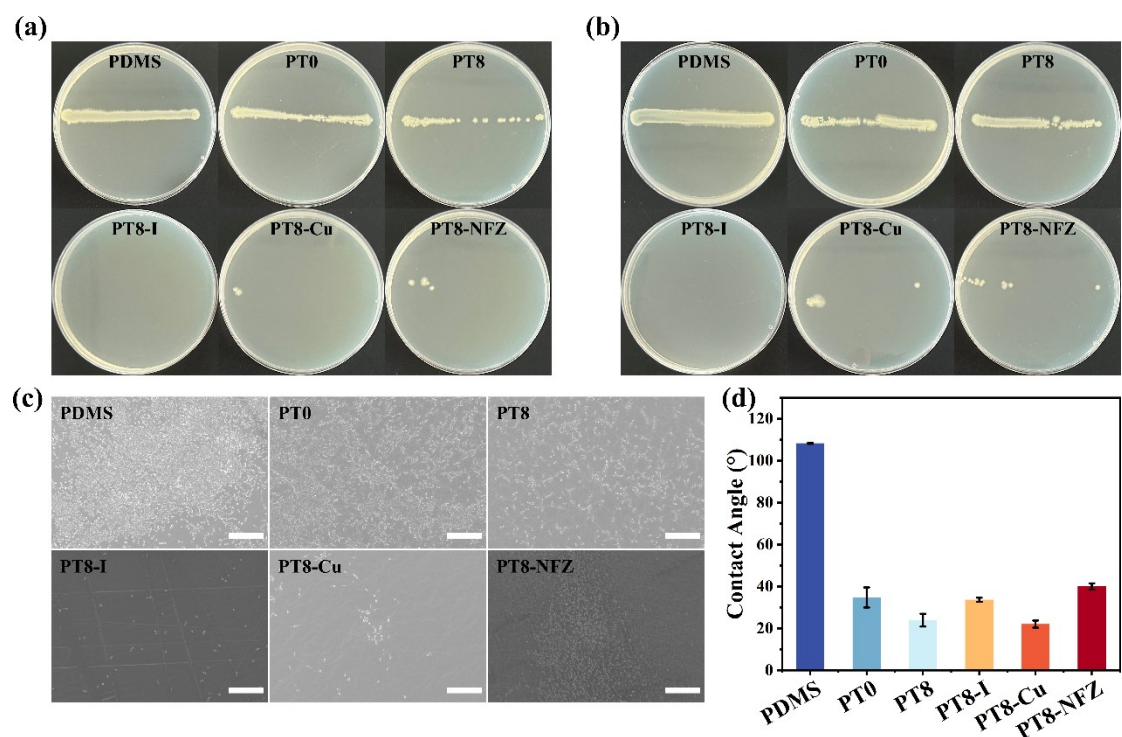

**Figure S9.** (a) Pristine and modified PDMS balls slid on agar plate after exposure to *E. coli* suspension ( $10^8$  CFU/mL in PBS) for 4 h. (b-d) Pristine and modified PDMS balls were subjected to the frictional test with a total sliding distance of 300 cm: (b) Pristine and modified PDMS balls slid on agar plate after bacteria exposure. (c) SEM images of *E. coli* adhesion on pristine and modified PDMS surfaces after bacteria exposure. Scale bars represent 20  $\mu\text{m}$ . (d) Water contact angles of pristine and modified PDMS surfaces after the frictional test.

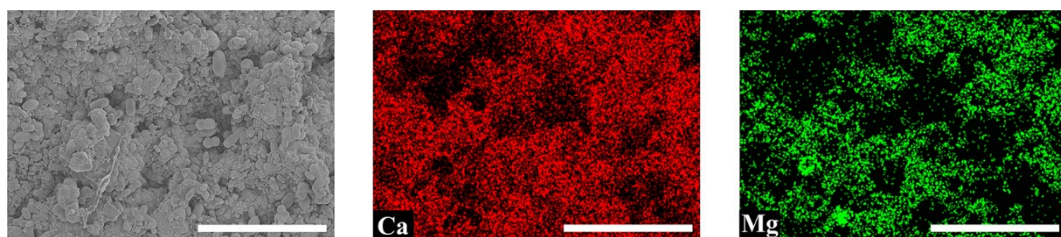

**Figure S10.** SEM images and EDS mappings of encrustation collected from the lumen of the unmodified catheter after implantation for 7 days. Scale bars represent 100  $\mu\text{m}$ .

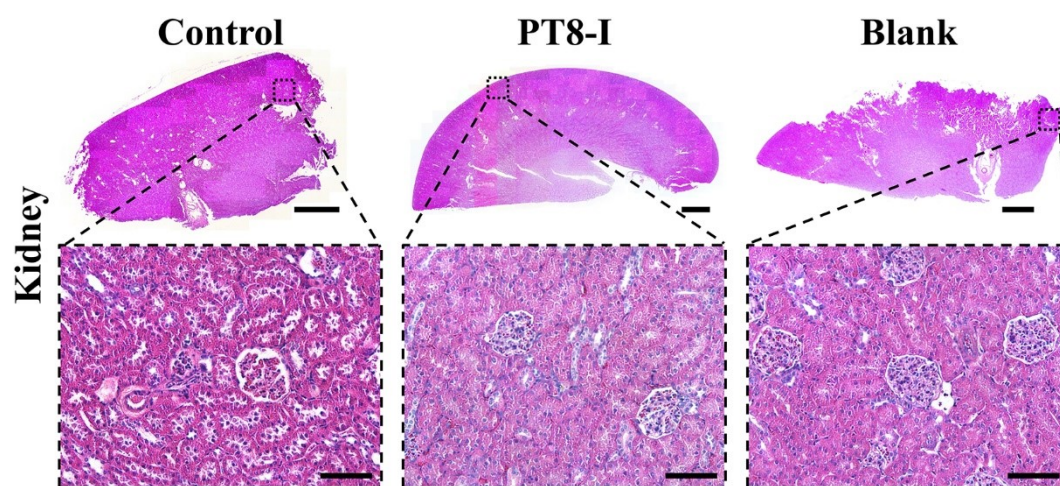

**Figure S11.** Representative images of H&E stained kidney of rabbit of the control group, PT8-I group, and blank group (without catheterization) after 7 days of study. Scale bars in the main images and insets represent 2 mm and 100  $\mu$ m, respectively.
